# Supplementary material for: A double responsive fluorescent platform for sensing heavy metal ions based on a dual-emitting fluorescent covalent organic framework hydrogel film
Source: Royal Society of Chemistry journal article supplement (doi:10.1039/d2dt01810a), 2022-01-01
Supplement: d2dt01810a2.pdf [file d2dt01810a2.pdf]

## Supporting Information

### **A double responsive fluorescent platform for sensing heavy metal ions based on a dual-emitting fluorescent covalent organic framework hydrogel film**

Yinghua Jia,<sup>a</sup> Jinmin Wang,<sup>a</sup> Limin Zhao<sup>b</sup> and Bing Yan<sup>a\*</sup>

<sup>a</sup> *School of Chemical Science and Engineering, Tongji University, Siping Road 1239, Shanghai 200092, China.*

<sup>b</sup> *School of Materials Science and Engineering, Liaocheng University, Liaocheng 252000, China*

---

\* Corresponding author: Email address: [byan@tongji.edu.cn](mailto:byan@tongji.edu.cn) (Bing Yan)

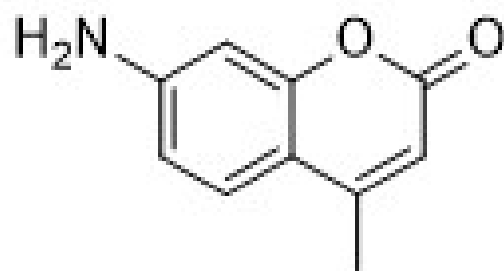

**Scheme S1.** The chemical structural formula of 7-amino-4-methyl coumarin.

### Supporting Figures

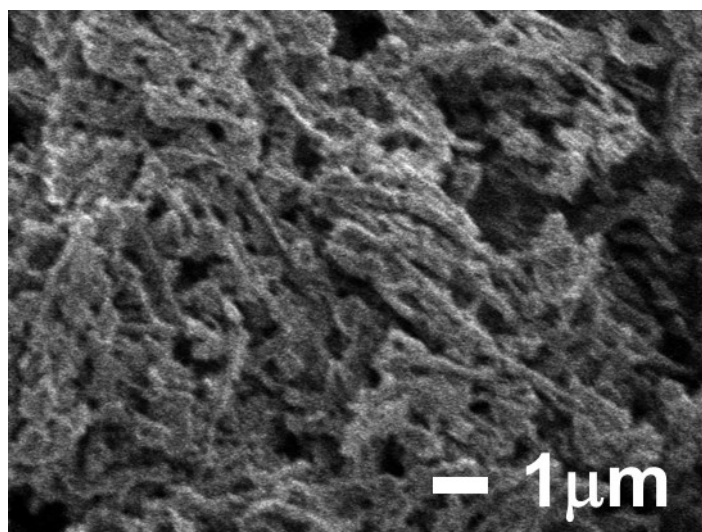

**Fig. S1** SEM images of TpDq.

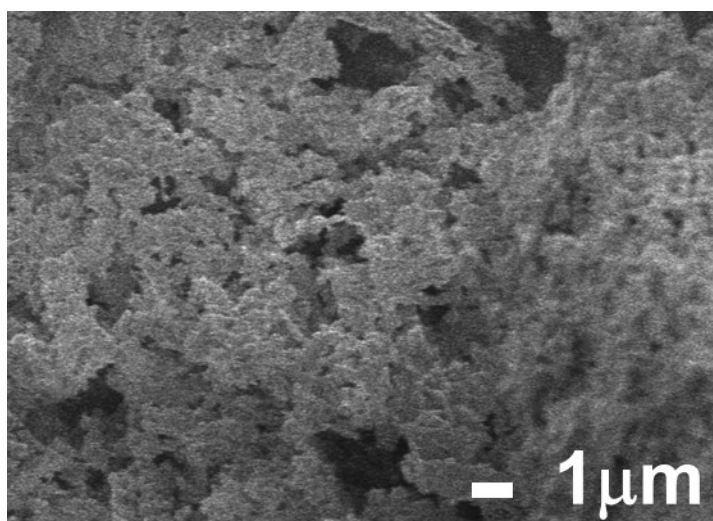

**Fig. S2** SEM images of Dye@TpDq.

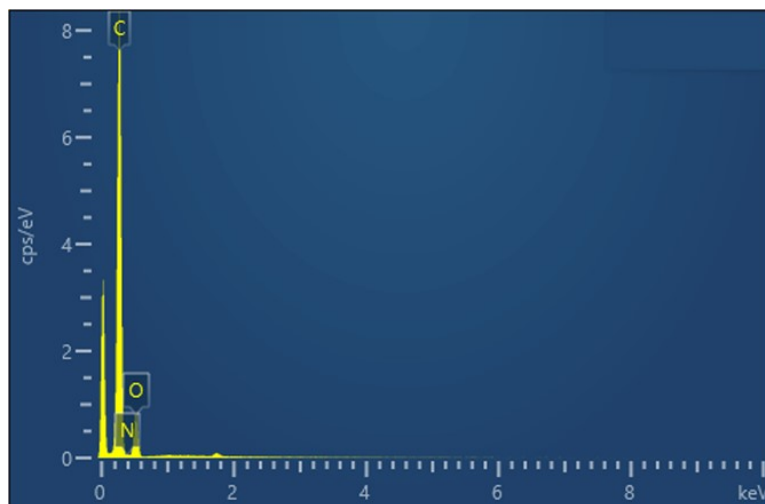

**Fig. S3** EDX spectrum of TpDq.

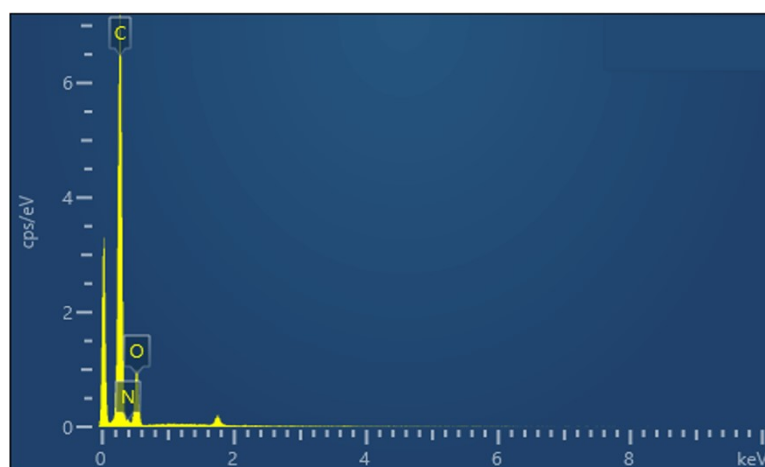

**Fig. S4** EDX spectrum of Dye@TpDq.

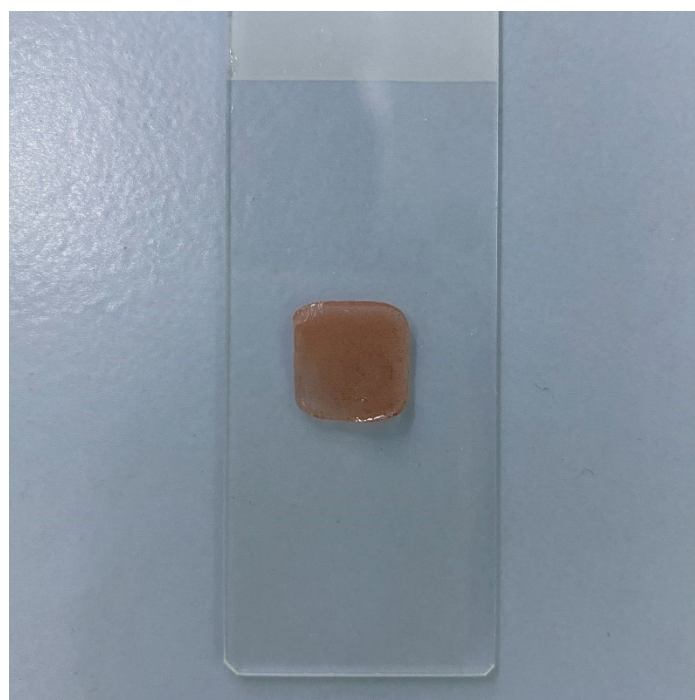

**Fig. S5** Picture of 1.

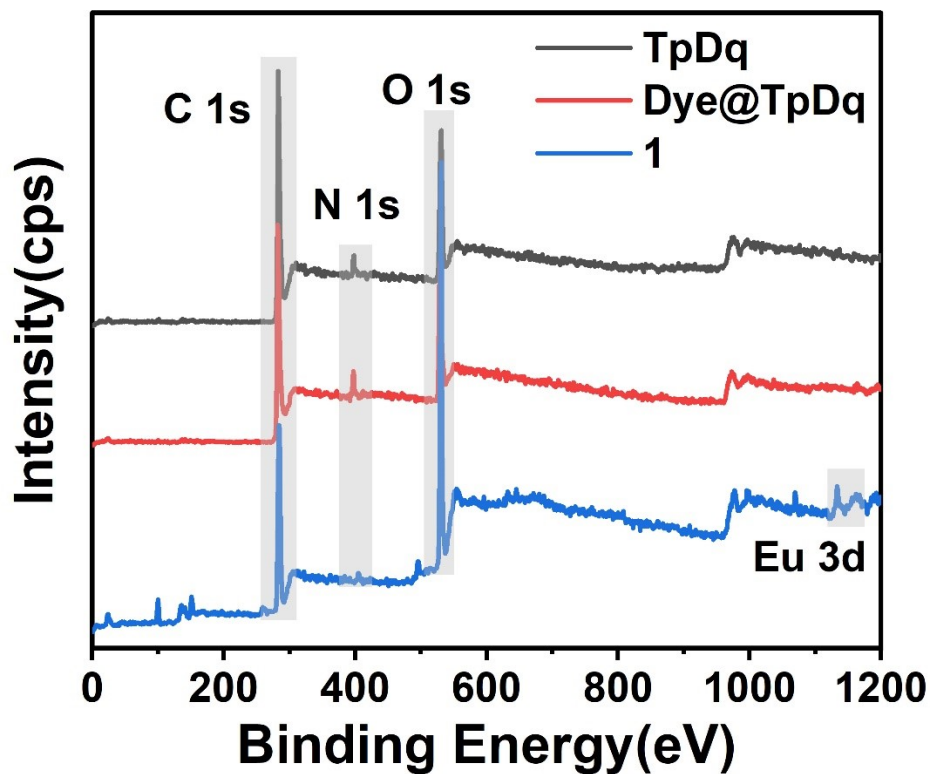

Fig. S6 XPS spectra of pristine TpDq, Dye@TpDq and 1.

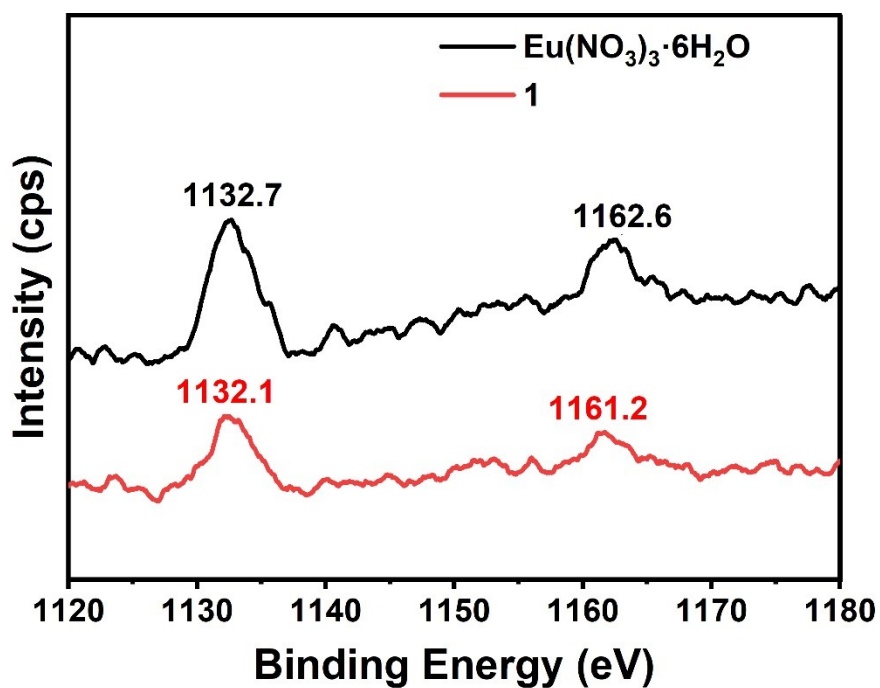

Fig. S7 XPS spectra of 1 and Eu(NO<sub>3</sub>)<sub>3</sub>·6H<sub>2</sub>O for the Eu 3d electron.

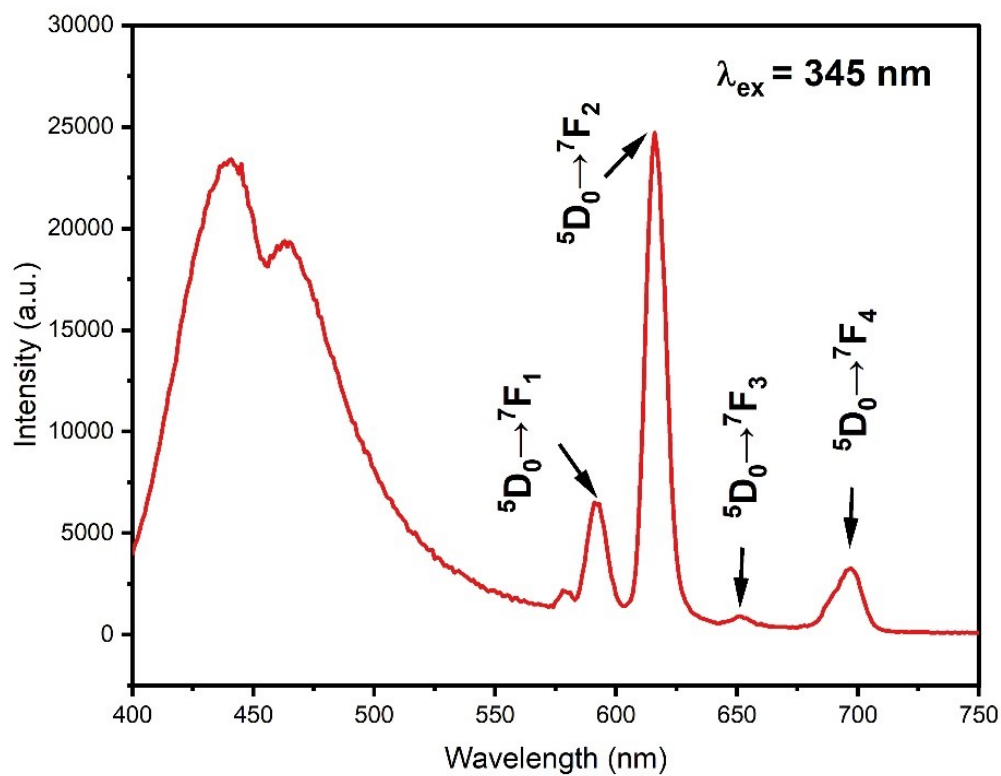

Fig. S8 The luminescence spectrum of 1.

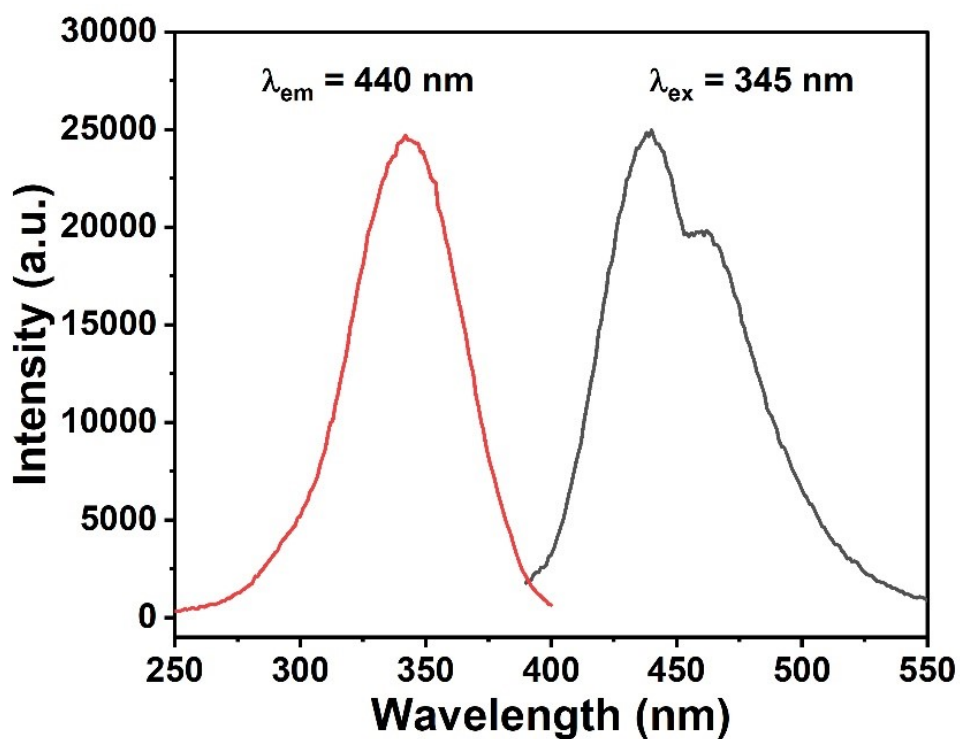

Fig. S9 Excitation and emission spectra of Dye@TpDq in aqueous solution.

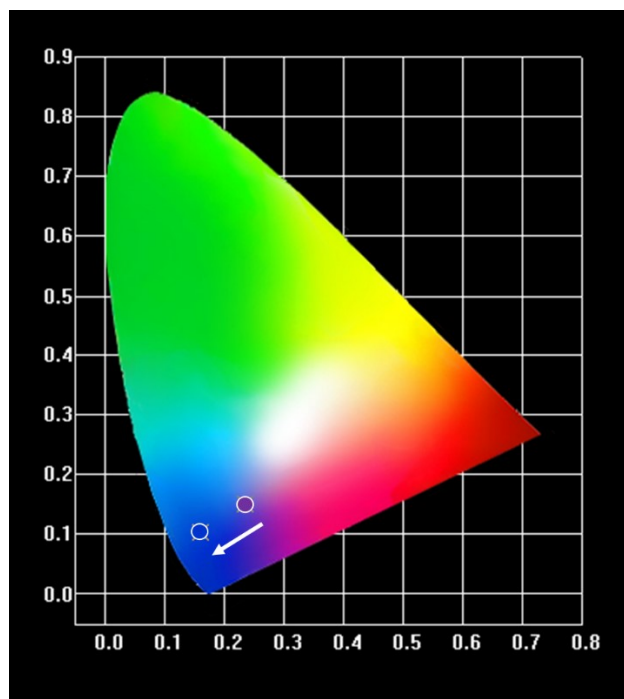

**Fig. S10** Changes of CIE coordinates of emitted light after detection of  $\text{Cu}^{2+}$ .

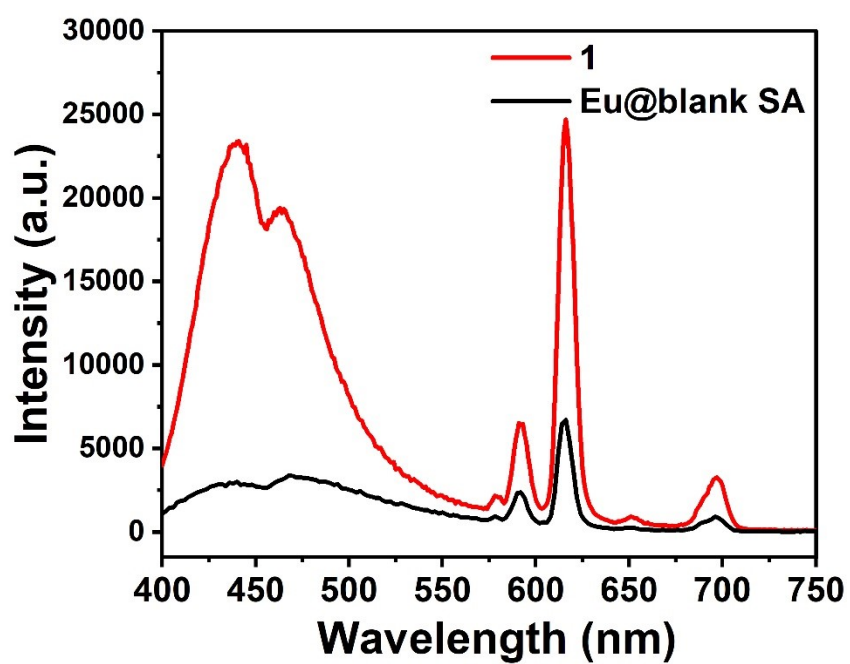

**Fig. S11** Comparison of emission spectra of Eu@blank SA film and **1**.

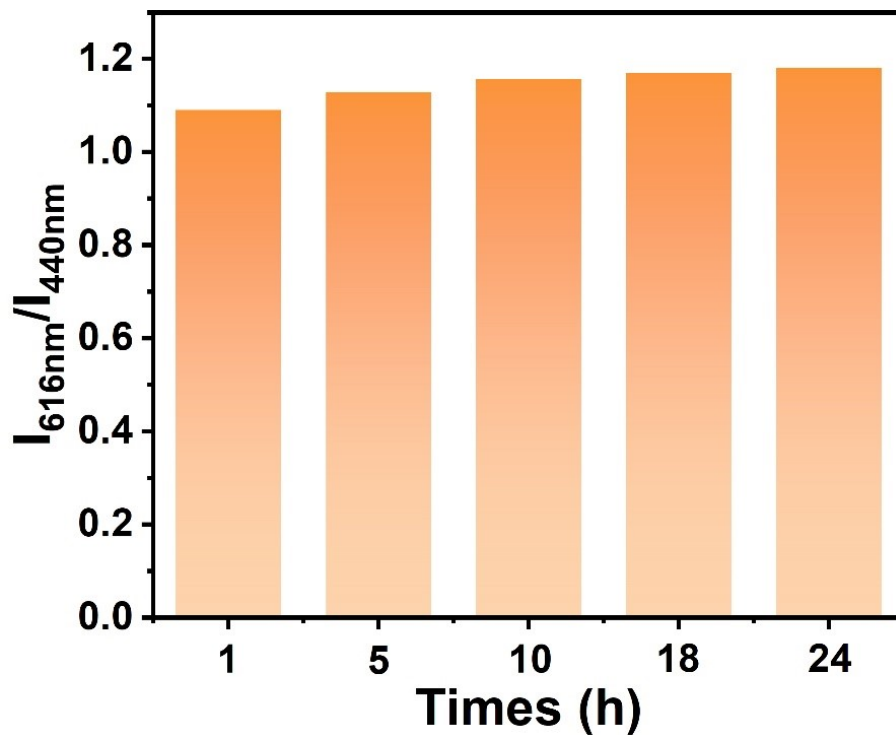

**Fig. S12** Time-dependent emission intensities ratio ( $I_{616\text{nm}}/I_{440\text{nm}}$ ) of **1** soaking in aqueous solution.

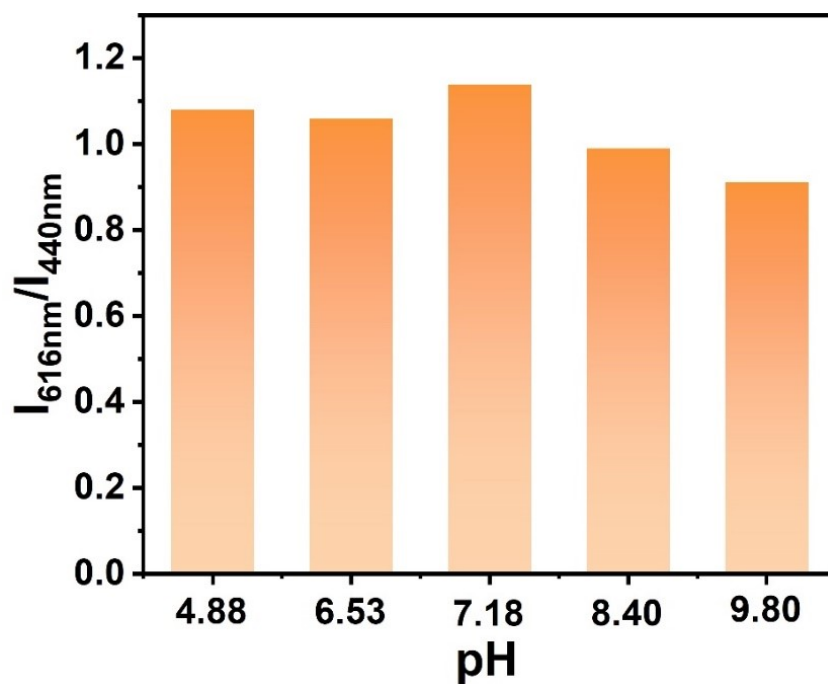

**Fig. S13** The emission intensities ratio ( $I_{616\text{nm}}/I_{440\text{nm}}$ ) of **1** immersed in different pH solutions for 30 min.

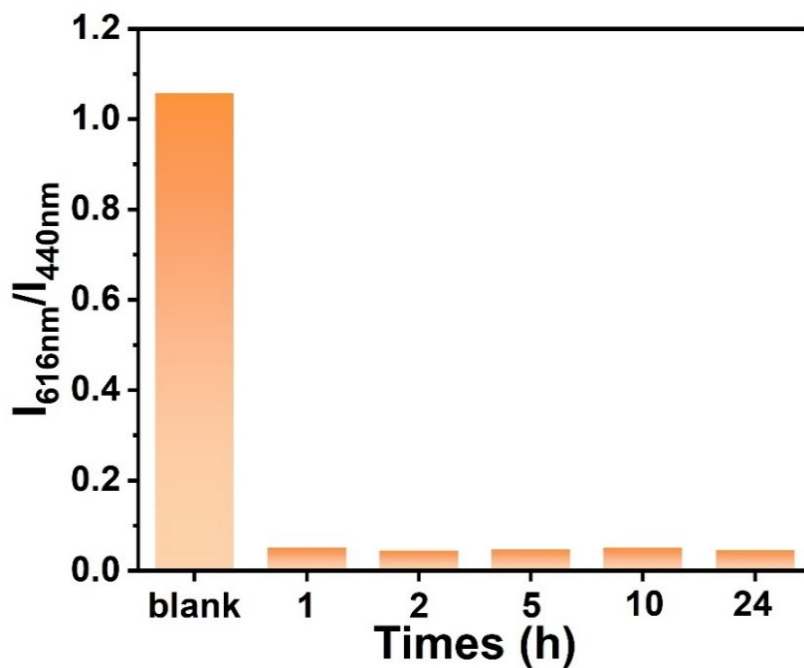

**Fig. S14** The emission intensities ratio ( $I_{616\text{nm}}/I_{440\text{nm}}$ ) of **1** added  $10^{-2}$  M  $\text{Cu}^{2+}$  in aqueous solution set aside with different times. The emission of blank was used as a reference for other samples.

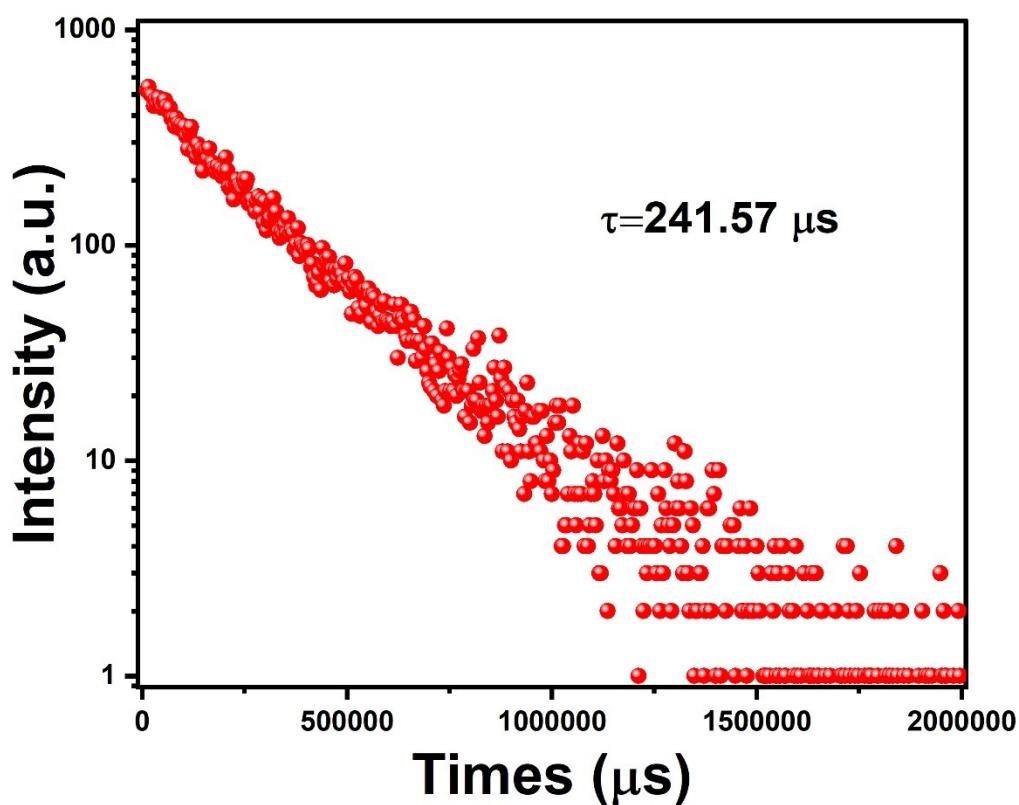

**Fig. S15** Lifetime decay curve of **1** ( $\lambda_{\text{ex}} = 345$  nm,  $\lambda_{\text{em}} = 616$  nm).



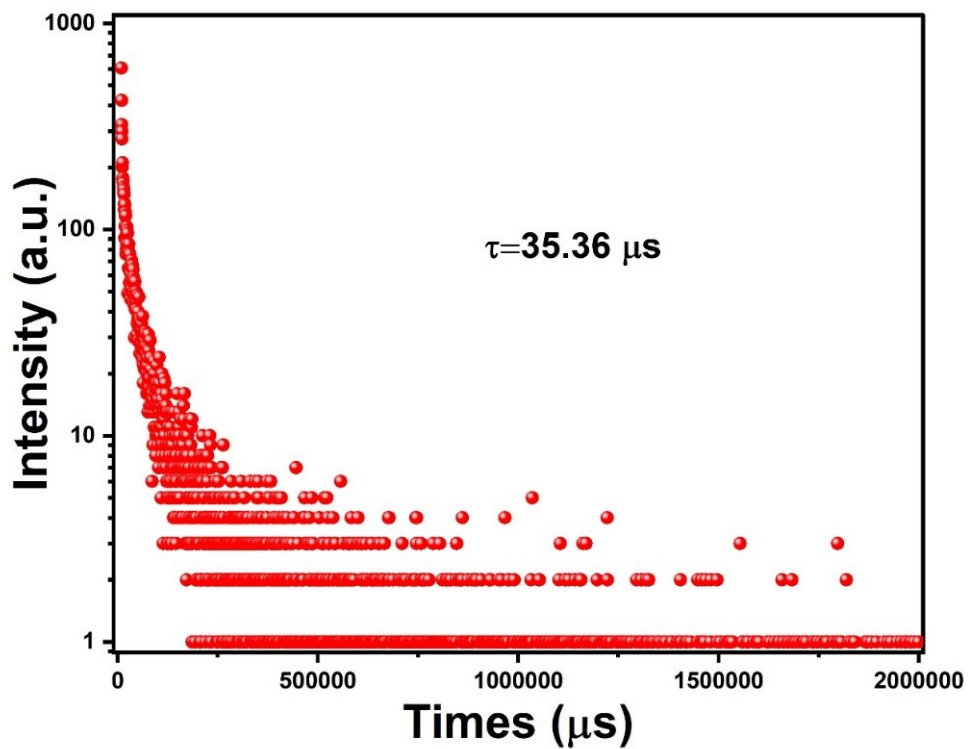

Fig. S16 Lifetime decay curve of **1** added with  $10^{-2}$  M  $\text{Cu}^{2+}$  ( $\lambda_{\text{ex}} = 345$  nm,  $\lambda_{\text{em}} = 616$  nm).

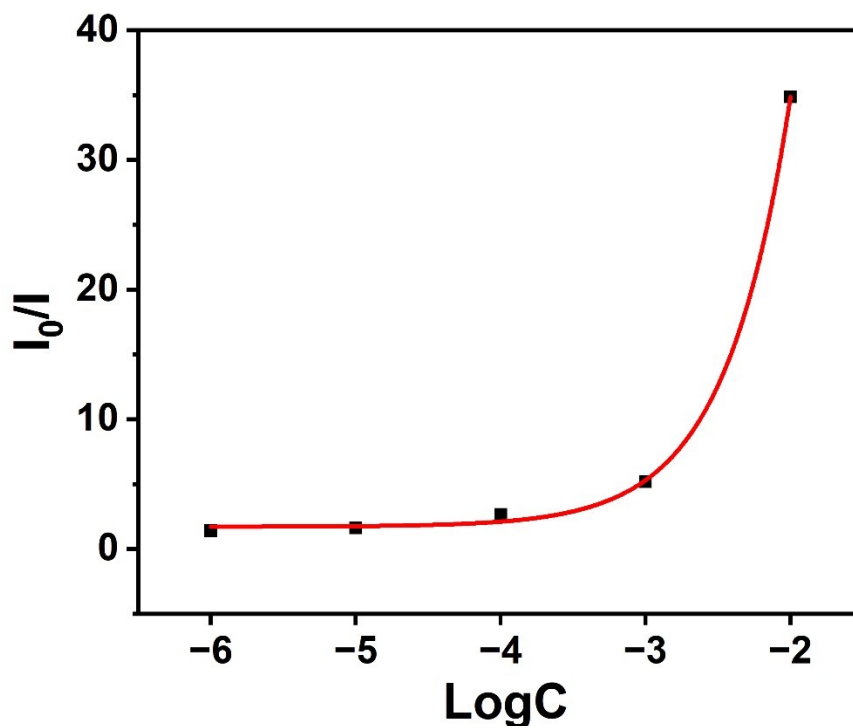

Fig. S17 S–V intensity plot of  $\text{Cu}^{2+}$ .

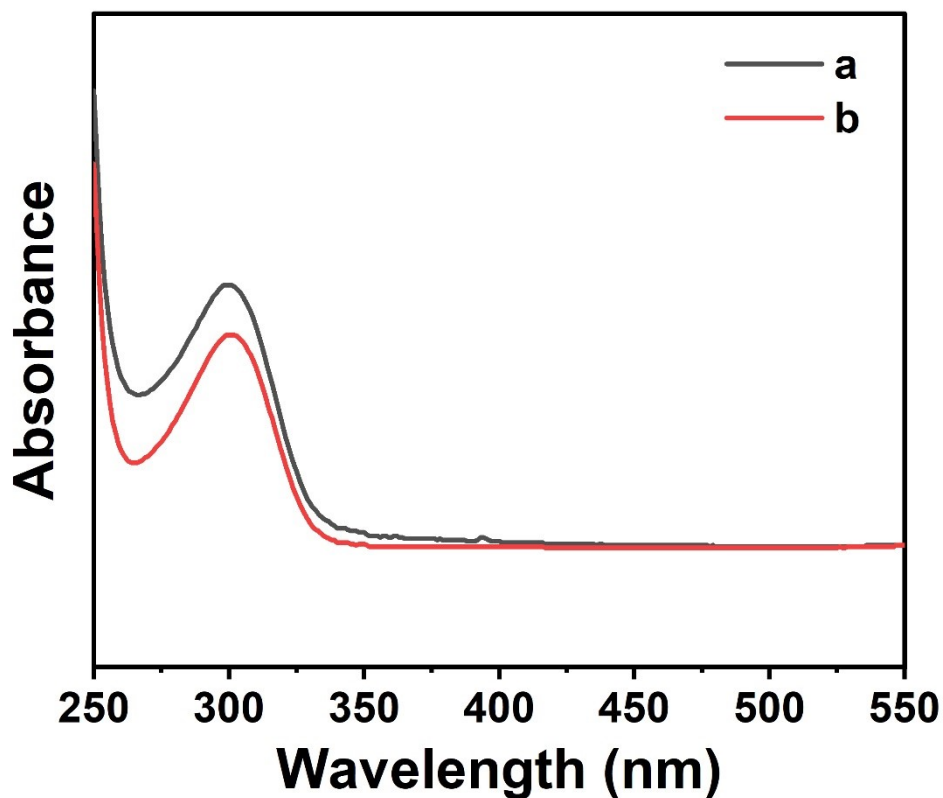

Fig. S18 UV-vis absorption spectra of  $\text{Cu}^{2+}$  solutions before (a) and after (b) soaking **1**.

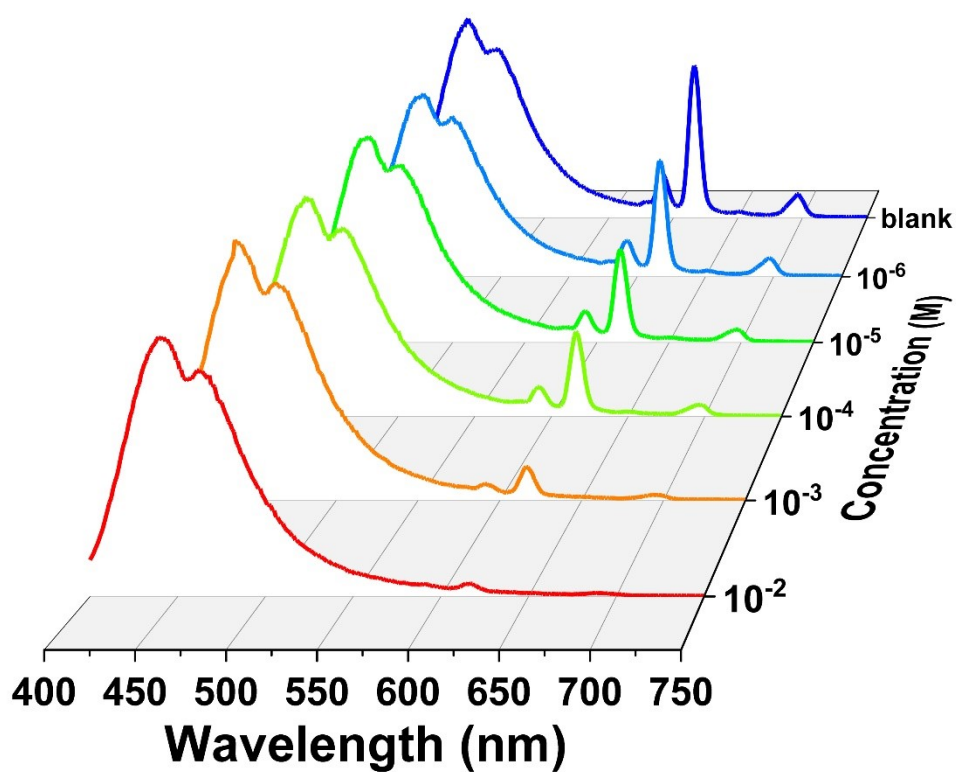

Fig. S19 Luminescence spectra of **1** after immersion in  $10^{-6}$ - $10^{-2}$  M  $\text{Cu}^{2+}$  drinking water solution ( $\lambda_{\text{ex}} = 345$  nm)

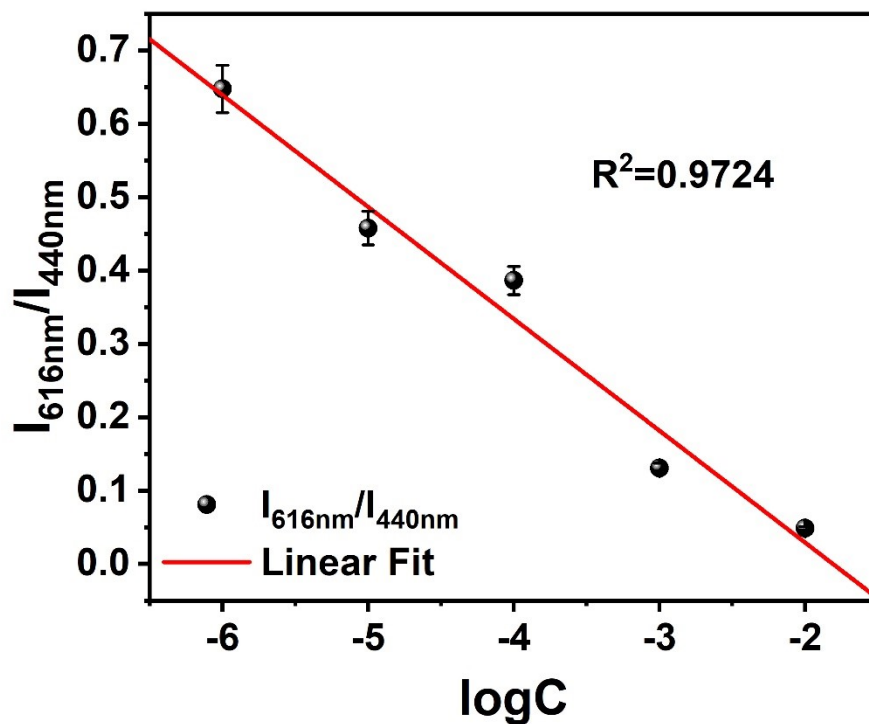

Fig. S20 The corresponding calibration curves ( $I_{616\text{nm}}/I_{440\text{nm}}$ ).

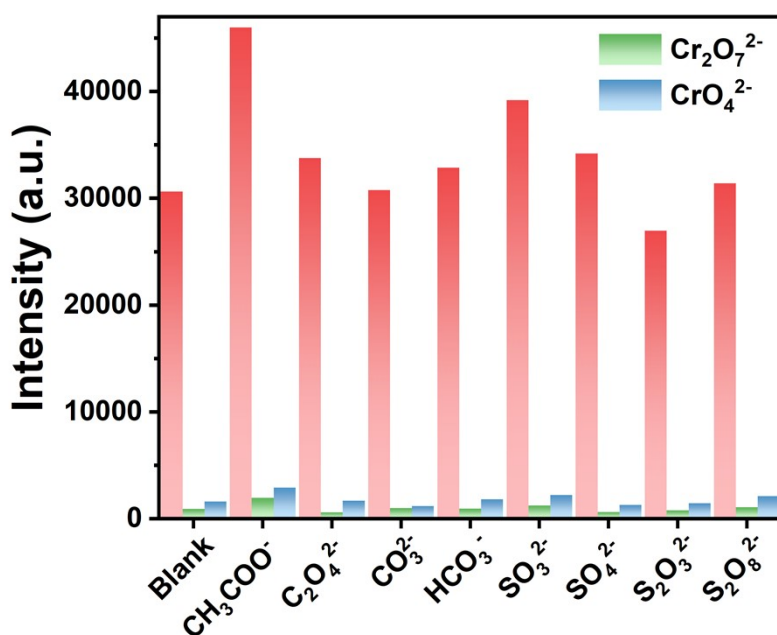

Fig. S21 Histogram of the 616 nm emission intensities of **1** in various anion solutions before and after the addition of  $\text{Cr}_2\text{O}_7^{2-}$  and  $\text{CrO}_4^{2-}$  ( $10^{-2}$  M).

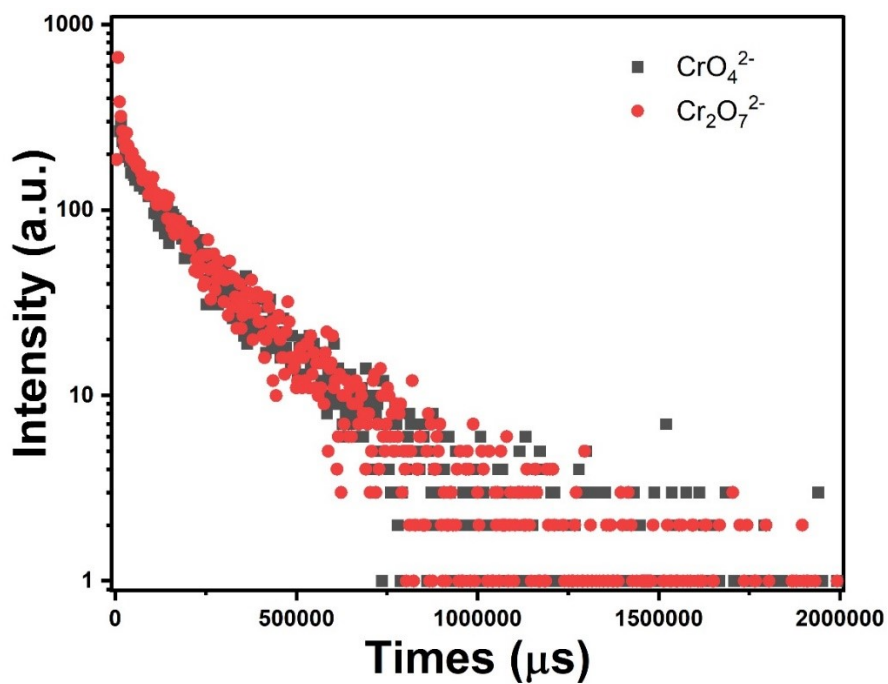

**Fig. S22** Lifetime decay curve of 1 added with  $10^{-2}$  M  $\text{Cr}_2\text{O}_7^{2-}$  and  $\text{CrO}_4^{2-}$  ( $\lambda_{\text{ex}} = 345$  nm,  $\lambda_{\text{em}} = 616$  nm).

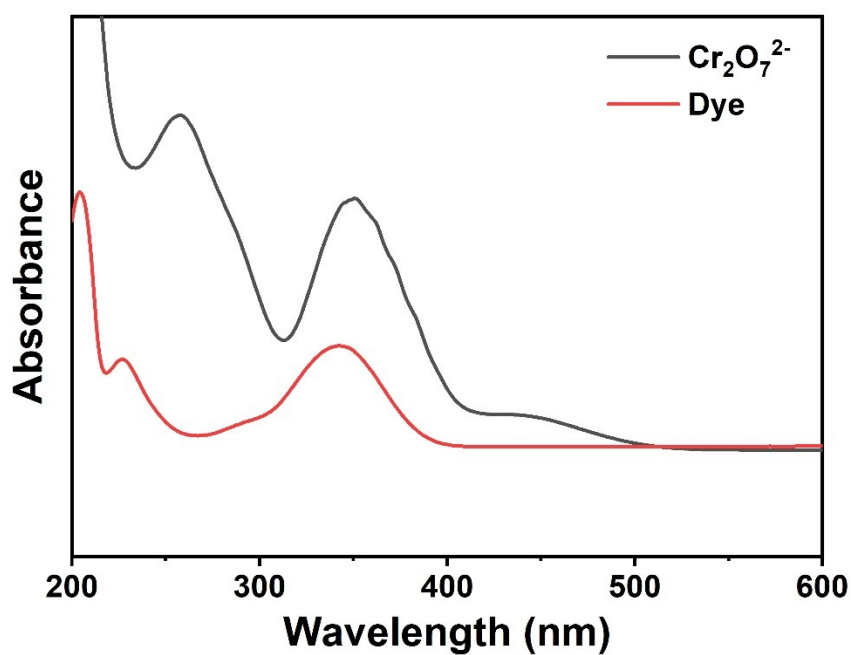

**Fig. S23** UV-vis absorption spectra of Cr(VI) and dye.

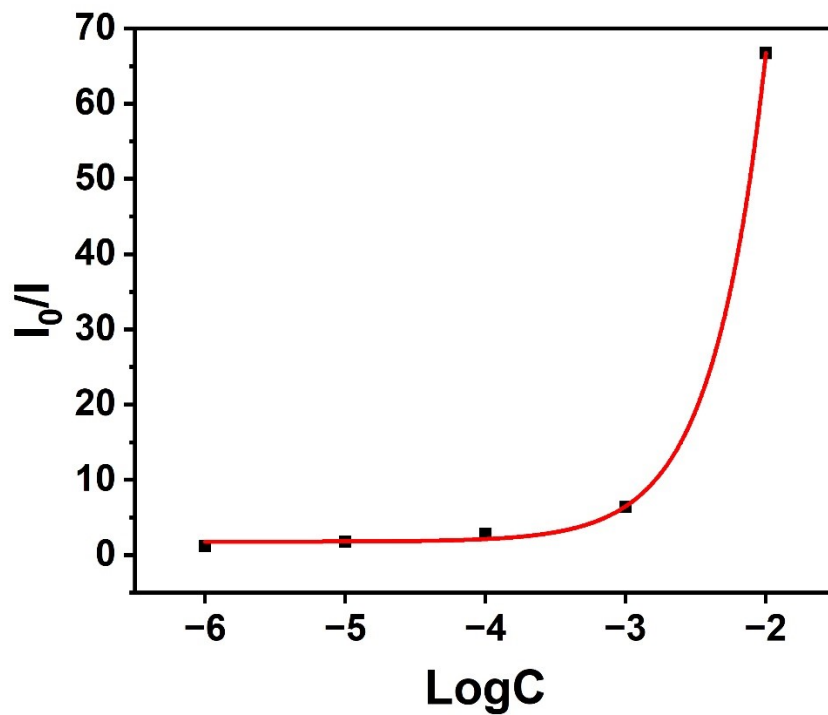

Fig. S24 S–V intensity plot of  $\text{Cr}_2\text{O}_7^{2-}$ .

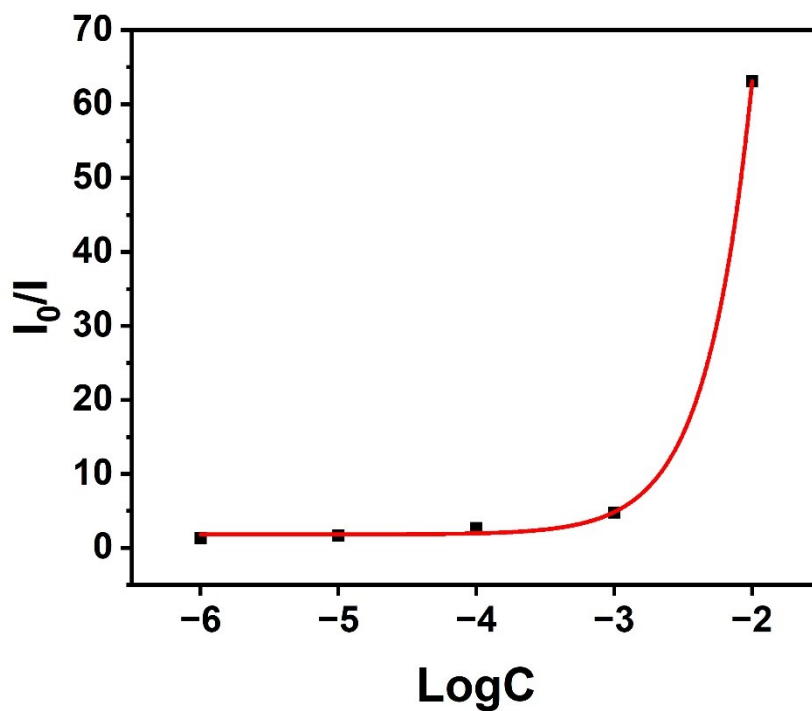

Fig. S25 S–V intensity plot of  $\text{CrO}_4^{2-}$ .

**Table S1** The weight percentage of all elements in TpDq, Dye@TpDq and **1** determined by Energy dispersive X-ray (EDX).

| Element | Weight percentages |          |       |
|---------|--------------------|----------|-------|
|         | TpDq               | Dye@TpDq | 1     |
| C       | 75.31              | 69.77    | 45.75 |
| N       | 7.25               | 9.35     | 1.36  |
| O       | 17.43              | 20.88    | 40.53 |
| Eu      | -                  | -        | 12.36 |

**Table S2** Responses of luminescence lifetimes of **1** towards various concentrations of  $\text{Cu}^{2+}$ .

| Concentration (mol/L) | $\tau$ ( $\mu\text{s}$ ) |
|-----------------------|--------------------------|
| 0                     | 241.57                   |
| $10^{-6}$             | 214.30                   |
| $10^{-4}$             | 174.57                   |
| $10^{-2}$             | 35.36                    |

**Table S3** Responses of luminescence lifetimes of **1** towards various concentrations of  $\text{Cr}_2\text{O}_7^{2-}$  (top) and  $\text{CrO}_4^{2-}$  (bottom).

| Concentration (mol/L) | $\tau$ ( $\mu\text{s}$ ) |
|-----------------------|--------------------------|
| 0                     | 241.57                   |
| $10^{-6}$             | 207.00                   |
| $10^{-4}$             | 179.13                   |
| $10^{-2}$             | 167.77                   |

| Concentration (mol/L) | $\tau$ ( $\mu\text{s}$ ) |
|-----------------------|--------------------------|
| 0                     | 241.57                   |
| $10^{-6}$             | 207.93                   |
| $10^{-4}$             | 182.17                   |
| $10^{-2}$             | 174.31                   |

The detection limit (LOD) can be calculated by the following equation:

$$3.3\sigma / \text{LOD} = \text{Signal intensity (A)} / \text{Concentration (A)}$$

$\sigma$  is the standard deviation of luminescent intensity for 20 replicating fluorescence measurements of blank solutions,

A is the minimum concentration in the linear relationship.
